# Supplementary material for: Critical immunosuppressive effect of MDSC-derived exosomes in the tumor microenvironment
Source: PubMed Central journal article supplement — Oncol Rep. 2021 Jan 14;45(3):1171–81. doi: 10.3892/or.2021.7936 (PMC7860000; doi:10.3892/or.2021.7936), 2021-01-14

Figure S1. Following the isolation of MDSCs, cell viability was assessed by flow cytometry using a 7-AAD antibody. MDSCs, myeloid-derived suppressor cells.

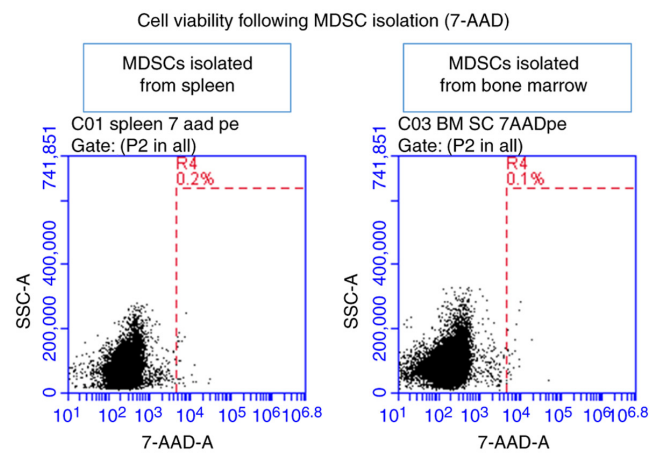

Figure S2. M1 macrophages were depleted *in vivo* following treatment with MDSC-derived exosomes (exo) compared to untreated animals. MDSCs, myeloid-derived suppressor cells.

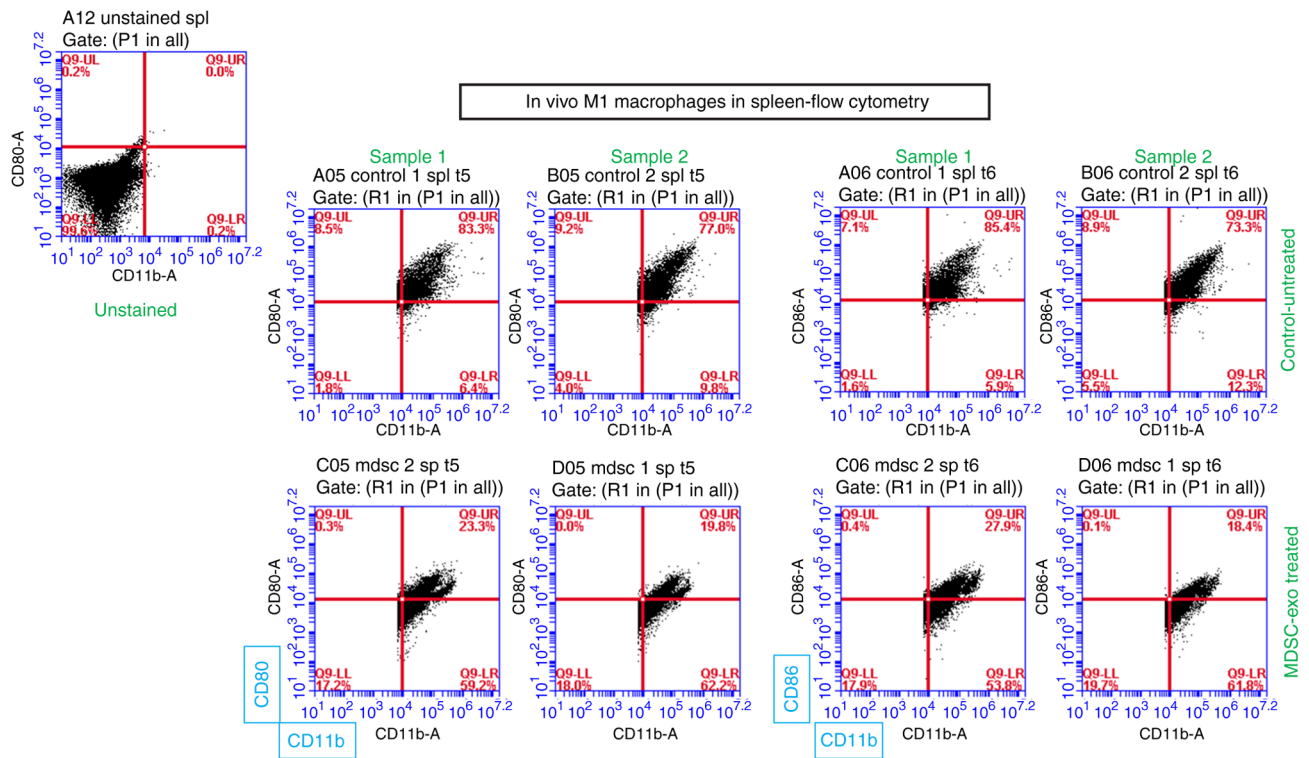

Figure S3. A significant increase in M2 macrophage distribution was noted *in vivo* following treatment with MDSC-derived exosomes (exo) compared to untreated animals. MDSCs, myeloid-derived suppressor cells.

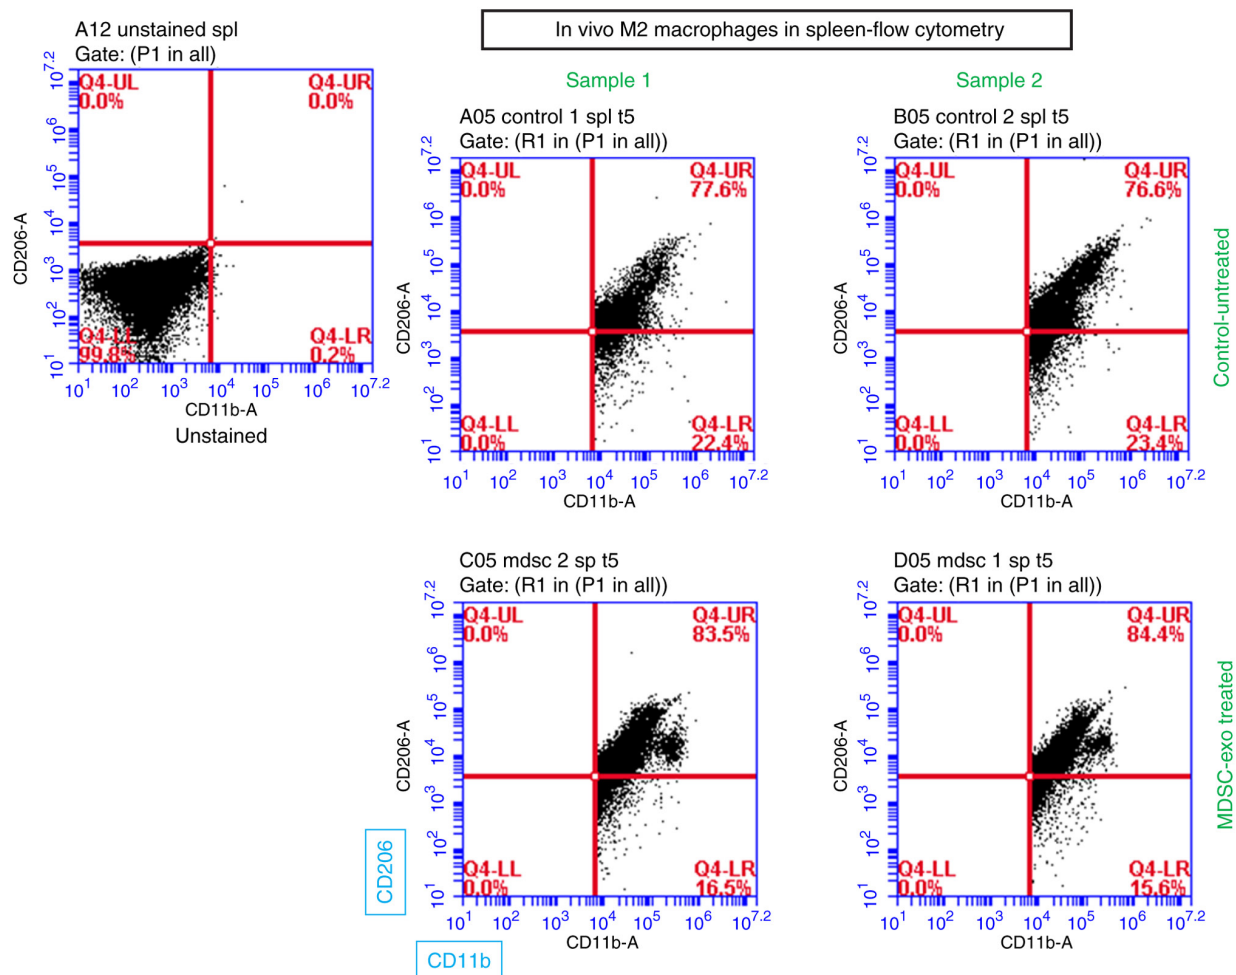

Figure S4. A significant decrease in monocytic MDSCs (CD11b<sup>+</sup>Gr1<sup>+</sup>Ly6C) and increase in granulocytic MDSC (CD11b<sup>+</sup>Gr1<sup>+</sup>Ly6G) distribution (in spleen) *in vivo* following treatment with MDSC-derived exosomes (exo) compared to untreated animals. MDSCs, myeloid-derived suppressor cells.

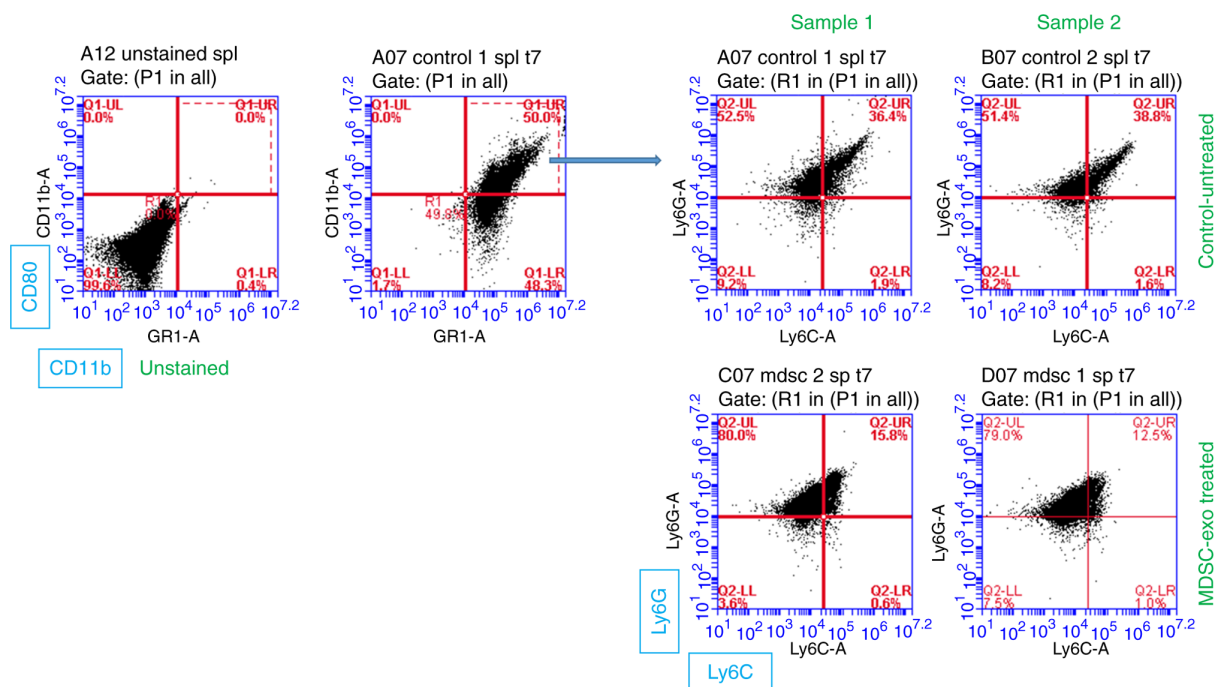

Figure S5. An increase in CD4<sup>+</sup>CD25<sup>+</sup> and CD4<sup>+</sup>CD184<sup>+</sup> T-regulatory cells was seen *in vivo* following treatment with MDSC-derived exosomes (exo) compared to untreated animals. MDSCs, myeloid-derived suppressor cells.

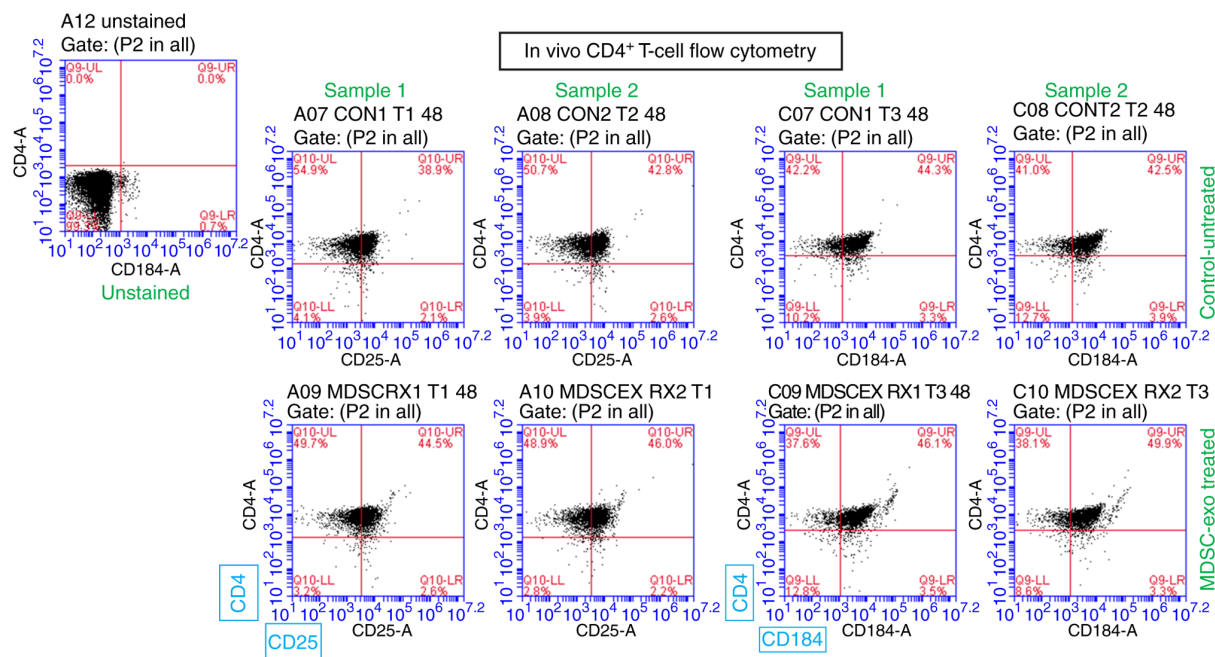

Figure S6. An increase in naïve T-cells ( $CD8^+CD62L^+$ ), and exhausted T-cells ( $CD8^+CD279^+$ ) was noted *in vivo* following treatment with MDSC-derived exosomes (exo) compared to untreated animals. MDSCs, myeloid-derived suppressor cells.

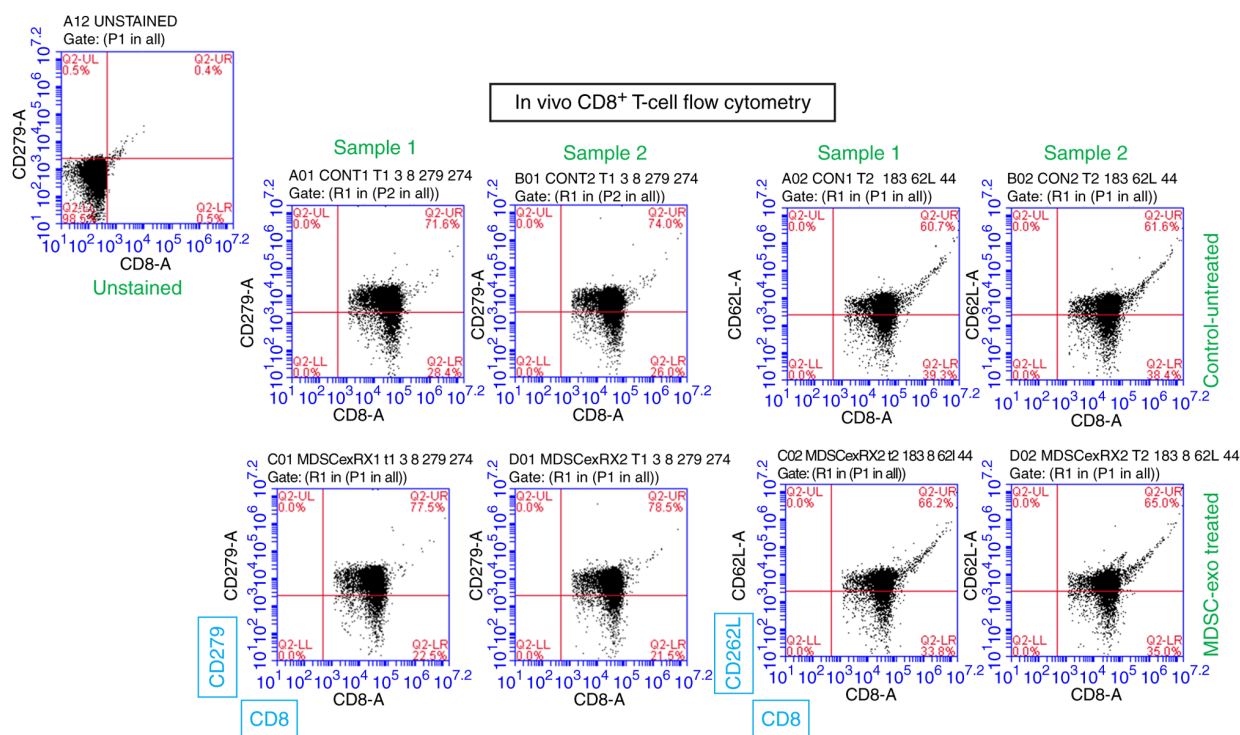

Supplement: Supplementary_Data.pdf [file Supplementary_Data.pdf]
